# Supplementary material
Source: publisher figshare collection journal article supplement (https://geolsoc.figshare.com/ndownloader/files/5424371)
Supplement: Supplementary file 1 [file 5424371]

LA-ICPMS data from sample E1201
								Corrected isotope ratios															Dates (Ma)											207-corrected		208-corrected			Concentrations (ppm)
		U	Th	Pb*		206Pb		208Pb*	±2s	206Pb*	±2s	207Pb*	±2s	206Pb*	±2s	error	238U	±2s	207Pb*	±2s	error		208Pb*	±2s	207Pb*	±2s	207Pb*	±2s	206Pb*	±2s		%		206Pb*	±2s	206Pb*	±2s
Analysis	Notes	ppm	ppm	ppm	Th/U	204Pb		232Th	(%)	207Pb*	(%)	235U*	(%)	238U	(%)	corr.	206Pb*	(%)	206Pb*	(%)	corr.		232Th	(Ma)	206Pb*	(Ma)	235U	(Ma)	238U*	(Ma)		disc.		238U*	(Ma)	238U*	(Ma)		P	Ti	Y	Zr	Nb	La	Ce	Pr	Nd	Sm	Eu
E1201 26 5/17/2012 11:54:33 AM (Run: 1)		185	102	86.5		61812.54325		0.080195578	9.480444426	6.678917385	2.542148473	7.58947	6.4	0.36763	5.8	0.92	2.720092094	5.838102066	0.14972	2.5	-2.3938E-16		1559	142	2343	43	2184	57	2018	101		14		2184.200254	117.0760088	2047.957251	1797.651017
E1201 37 5/17/2012 12:16:34 PM (Run: 1)		212	124	77.7	0.58	1370.389502		0.07171177	6.546777019	8.9939206	1.932700266	4.47312	6.0	0.29178	5.6	0.95	3.427219487	5.638528791	0.11119	1.9	0		1400	89	1819	35	1726	49	1650	82		9		1726.38884	89.79808996	1669.07283	1057.352471		380	7.66	1215	506988.112	1.18	0.02	5.74	0.24	3.59	6.39	1.00
E1201 39 5/17/2012 12:19:55 PM (Run: 1)		153	120	60.4	0.79	1447.646881		0.082147213	6.254043408	9.009467537	2.140481794	4.55597	6.3	0.29770	5.9	0.94	3.359086832	5.911897611	0.11099	2.1	-2.80751E-16		1596	96	1816	39	1741	52	1680	87		7		1741.56743	96.136725	1688.588017	1390.22852		313	8.36	1655	526639.2754	1.57	0.05	5.13	0.36	5.54	9.85	1.11
E1201 47 5/17/2012 12:40:16 PM (Run: 1)		133	84	51.4	0.63	24053.70911		0.084694361	6.055388539	9.065409181	1.935311555	4.57487	6.0	0.30079	5.7	0.95	3.324568378	5.717793033	0.11031	1.9	-3.21056E-16		1643	96	1805	35	1745	50	1695	85		6		1744.953823	94.00604832	1699.464754	1173.299875		327	11.92	1017	499297.4125	1.80		5.36	0.09	1.08	3.56	0.43
E1201 12 5/17/2012 11:20:33 AM (Run: 1)		115	67	45.6	0.59	723.6413798		0.089174624	6.091590058	9.079775613	1.854629935	4.72448	5.6	0.31112	5.3	0.94	3.214191075	5.306670895	0.11013	1.9	0		1727	101	1802	34	1772	47	1746	81		3		1771.719293	90.34599842	1747.678653	462.3198952		310	12.03	882	486266.2914	2.03		4.49	0.05	1.07	2.93	0.29
E1201 25 5/17/2012 11:52:52 AM (Run: 1)		120	91	48.1	0.76	901.2541941		0.079733085	7.112745679	9.094335871	1.98246781	4.66169	6.4	0.30748	6.0	0.95	3.252273798	6.044544056	0.10996	2.0	2.96477E-16		1551	106	1799	36	1760	53	1728	92		4		1760.554243	101.6688614	1745.730628	688.8207617		301	12.93	1282	541179.688	1.31		5.05	0.06	2.12	5.24	0.68
E1201 19 5/17/2012 11:35:53 AM (Run: 1)		102	59	40.8	0.58	4819.533311		0.089424044	7.04686419	9.15747949	1.351971506	4.71309	5.8	0.31303	5.6	0.97	3.19462589	5.620935261	0.10920	1.4	-9.35005E-16		1731	117	1786	25	1770	48	1756	86		2		1769.638444	96.31204331	1757.364375	970.1882962		280	5.31	629	500613.6847	1.86		4.42		0.93	1.82	0.19
E1201 51 5/17/2012 12:46:58 PM (Run: 1)		157	105	63.3	0.67	613.9407838		0.09297938	6.113484744	9.170861056	2.067844029	4.61299	7.1	0.30683	6.8	0.96	3.259180882	6.764499628	0.10904	2.1	0		1797	105	1783	38	1752	59	1725	102		3		1751.756182	113.5916771	1718.854451	633.1436588		353	3.34	1278	467669.9348	1.67	0.20	5.60	0.08	2.06	6.12	0.67
E1201 32 5/17/2012 12:04:36 PM (Run: 1)		171	122	61.1	0.71	1084.010159		0.071965359	8.892293916	9.185278982	2.160481249	4.13969	9.4	0.27578	9.1	0.97	3.626108318	9.106557427	0.10887	2.2	3.61148E-16		1405	121	1781	39	1662	77	1570	127		12		1662.678081	137.0935592	1585.651924	660.1882543		339	11.77	1361	501001.9625	2.85	0.21	7.09	0.32	3.58	6.38	1.14
E1201 50 5/17/2012 12:45:17 PM (Run: 1)		157	96	56.6	0.61	1390.389574		0.085406961	6.113987144	9.211046275	1.741437137	4.17581	6.2	0.27896	5.9	0.96	3.584689161	5.899811958	0.10857	1.7	3.45791E-16		1656	97	1775	32	1669	50	1586	83		11		1669.737098	89.90931278	1580.518498	781.8399389		381	6.38	1185	501700.9595	2.95	0.22	6.84	0.25	2.50	5.81	0.99
E1201 13 5/17/2012 11:22:14 AM (Run: 1)		169	106	64.3	0.63	3872.054734		0.078484309	7.220180334	9.213338032	1.90659092	4.47463	7.0	0.29900	6.8	0.96	3.344472012	6.780020695	0.10854	1.9	0		1527	106	1775	35	1726	58	1686	101		5		1726.484415	110.9038059	1699.096501	597.4719261		311	8.65	1019	498745.9993	2.94	0.06	6.89	0.19	2.42	4.84	0.60
E1201 57 5/17/2012 1:00:37 PM (Run: 1)		116	53	44.1	0.46	4891.580136		0.095105508	6.317061078	9.219485868	2.062925044	4.53669	6.4	0.30335	6.1	0.95	3.29651942	6.053279683	0.10847	2.1	-5.69005E-16		1836	111	1774	38	1738	53	1708	91		4		1737.876626	100.5272594	1700.519059	826.8248275		245	10.80	636	455507.1089	1.76	0.19	4.08	0.07	0.93	2.23	0.23
E1201 24 5/17/2012 11:51:12 AM (Run: 1)		477	187	154.6	0.39	2286.594284		0.066296484	7.122442592	9.235996999	1.865281985	4.01795	7.1	0.26915	6.9	0.97	3.715459864	6.891289335	0.10827	1.9	2.76385E-16		1297	90	1771	34	1638	58	1536	94		13		1638.399618	101.2748953	1548.382519	390.5747949		613	12.56	2884	540866.2046	9.17	0.20	24.99	0.99	10.11	16.52	5.03
E1201 45 5/17/2012 12:36:55 PM (Run: 1)		88	91	34.9	1.04	1305.123102		0.080452544	6.110292658	9.241977377	1.835385974	4.21187	5.6	0.28232	5.2	0.94	3.54210158	5.248844794	0.10820	1.8	1.84391E-16		1564	92	1769	34	1676	46	1603	74		9		1676.731972	81.0164718	1608.60147	1002.008231		142	10.23	556	511328.386	0.70	0.19	26.95	0.40	5.47	8.85	1.69
E1201 23 5/17/2012 11:42:35 AM (Run: 1)		245	201	92.3		5918.941798		0.070947649	6.038645953	9.333787702	1.376668698	4.25213	5.2	0.28785	5.0	0.96	3.474057122	5.023833615	0.10714	1.4	0		1385	81	1751	25	1684	43	1631	72		7		1684.435266	79.13129778	1657.37613	554.4826857
E1201 15 5/17/2012 11:29:10 AM (Run: 1)		190	118	65.5		2349.730282		0.066553085	7.050719291	9.406261957	1.654688906	4.02089	5.6	0.27431	5.4	0.96	3.645538429	5.362529474	0.10631	1.7	-2.00191E-16		1302	89	1737	30	1638	46	1563	74		10		1638.852571	80.49650752	1583.63785	607.4493332
E1201 42 5/17/2012 12:24:56 PM (Run: 1)		125	73	41.6	0.58	5081.228711		0.07110342	6.838157307	9.412090632	2.977353845	3.85014	8.0	0.26282	7.4	0.93	3.804859647	7.435515826	0.10625	3.0	-3.20958E-16		1388	92	1736	55	1603	65	1504	100		13		1603.864974	106.941981	1513.121086	550.200436		301	12.85	908	519296.2834	2.91	0.09	5.11	0.07	1.66	4.02	0.70
E1201 20 5/17/2012 11:37:33 AM (Run: 1)		354	122	113.0		249648.5502		0.056637527	12.38978176	9.455231374	1.605603484	3.94956	7.9	0.27084	7.7	0.98	3.69215977	7.707966804	0.10576	1.6	-2.87066E-16		1114	134	1728	29	1624	64	1545	106		11		1624.345216	114.2328746	1563.731201	557.8733753
E1201 30 5/17/2012 12:01:15 PM (Run: 1)		182	130	58.3	0.71	1386.3209		0.056344143	9.048593693	9.505574868	1.739047541	3.68601	5.4	0.25412	5.1	0.95	3.935193437	5.114795237	0.10520	1.7	0		1108	98	1718	32	1568	43	1460	67		15		1568.982948	71.15062808	1493.385123	695.069171		238	8.41	896	462796.2167	3.75	0.23	7.03	0.23	2.33	4.37	0.78
E1201 48 5/17/2012 12:41:56 PM (Run: 1)		22	18	8.1	0.80	3881.882068		0.074503648	6.384751355	9.537614394	3.602791297	4.00343	6.4	0.27693	5.3	0.83	3.611015891	5.338174202	0.10485	3.6	3.69452E-16		1452	89	1712	66	1635	52	1576	75		8		1635.222414	81.23134919	1589.086104	1544.355884		176	9.57	349	516747.0203	0.41		10.37	0.03	0.35	1.31	0.42
E1201 18 5/17/2012 11:34:12 AM (Run: 1)		141	76	44.6	0.54	4390.892022		0.073447368	8.021496552	9.687008132	2.411226876	3.56396	10.8	0.25039	10.5	0.97	3.993735029	10.50654695	0.10323	2.4	0		1433	111	1683	45	1542	85	1440	136		14		1542.153703	144.2108048	1441.065864	1037.257949		305	12.04	949	506891.6243	2.14		5.62	0.05	1.58	2.91	0.56
E1201 53 5/17/2012 12:50:19 PM (Run: 1)		69	41	20.9	0.59	265.043624		0.078524868	5.916191446	10.65659191	3.351078896	3.03542	6.4	0.23460	5.5	0.85	4.262496036	5.477136058	0.09384	3.4	-3.87126E-16		1528	87	1505	63	1417	49	1359	67		10		1416.961282	71.31184805	1344.914428	769.9648038		313	8.87	954	441590.6444	1.20		7.88	0.07	1.38	4.03	0.82
E1201 36 5/17/2012 12:14:53 PM (Run: 1)		56	113	19.1	2.01	411.769052		0.058060233	5.938095914	12.75536209	3.220138471	2.24438	6.6	0.20763	5.7	0.87	4.816294325	5.724219712	0.07840	3.2	3.85478E-16		1141	66	1157	64	1195	46	1216	63		-5		1194.85542	67.37018222	1242.33211	2464.732542		338	24.94	804	507377.4537	1.98	0.12	36.14	0.06	1.99	5.60	1.48
E1201 55 5/17/2012 12:57:16 PM (Run: 1)		57	180	24.0	3.14	602.1699409		0.064891744	5.701036803	12.78108516	4.332329362	2.15156	7.8	0.19944	6.5	0.83	5.013943474	6.48371332	0.07824	4.3	1.26478E-16		1271	70	1153	86	1166	54	1172	69		-2		1165.500341	73.43541752	1103.829011	6427.67359		423	49.37	1495	446308.5635	1.65	0.07	31.09	1.15	17.41	22.20	7.94
Experiment 1 - 17 May 2012
Isotope ratio and date errors include systematic calibration errors of 0.88% (207Pb/206Pb) and 9.32% (206Pb/238U) (2 sigma).
Trace element concentrations were deleted from analyses known to have intersected inclusions of non-zircon minerals based on P and Ti.
Ablation used a laser spot size of 30 microns, and a laser firing repetition rate of 10 Hz.
Activity of TiO2 for Ti-in-Zircon temperature calculation is 0.8.
[truncated: 38 more columns]
